# Supplementary material
Source: PubMed Central journal article supplement (PMC2602892)
Supplement: M805019200_1.pdf [file M805019200_1.pdf]

## Supplemental Figure S1

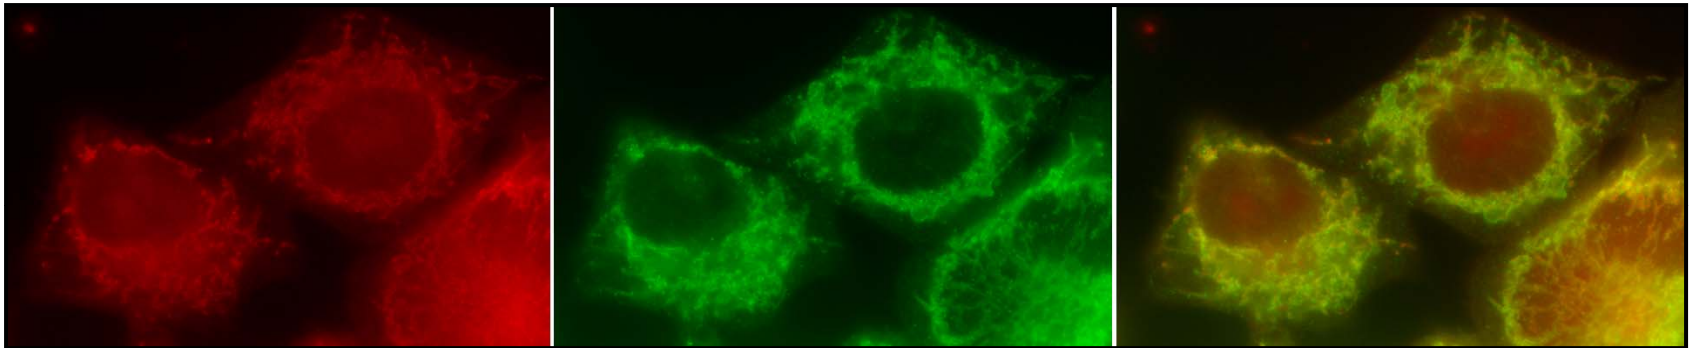

**Fig. S1: Immunofluorescent localization of HA-Bcl-xL.** KB-3/HA-Bcl-xL cells were fixed and permeabilized. Mitochondria (red signal, left panel) was visualized with Mitotracker Red, and Bcl-xL (green signal, center panel) was localized by probing with rabbit polyclonal Bcl-xL antibody and FITC goat anti-rabbit secondary antibody. Right panel, overlay image.

## Supplemental Figure S2

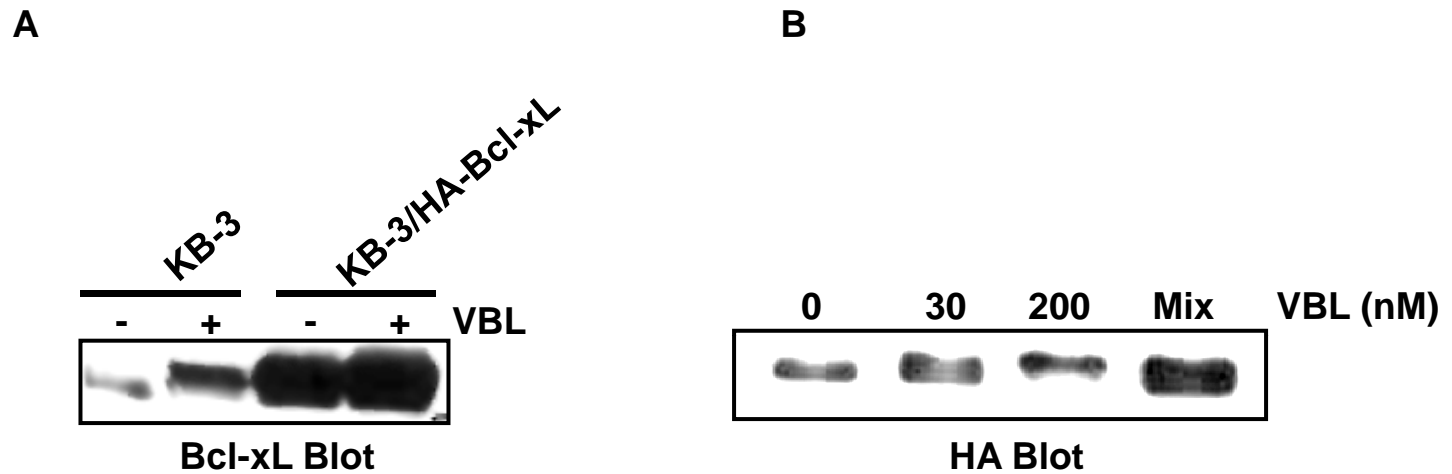

**Fig. S2:HA-Bcl-xL undergoes vinblastine-induced phosphorylation.** **A**, KB-3 or KB-3/HA-Bcl-xL cells were untreated or treated with vinblastine (VBL; 30 nM) and extracts (50  $\mu$ g) subjected to immunoblotting with Bcl-xL antibody. **B**, KB-3/HA-Bcl-xL cells were either untreated or treated with 30 or 200 nM VBL (16 h) and 3  $\mu$ g protein/lane analyzed for HA immunoreactivity by blotting. “Mix” indicates a mixture of samples prepared from cells at 0 and 200 nM VBL.

### Supplemental Figure S3

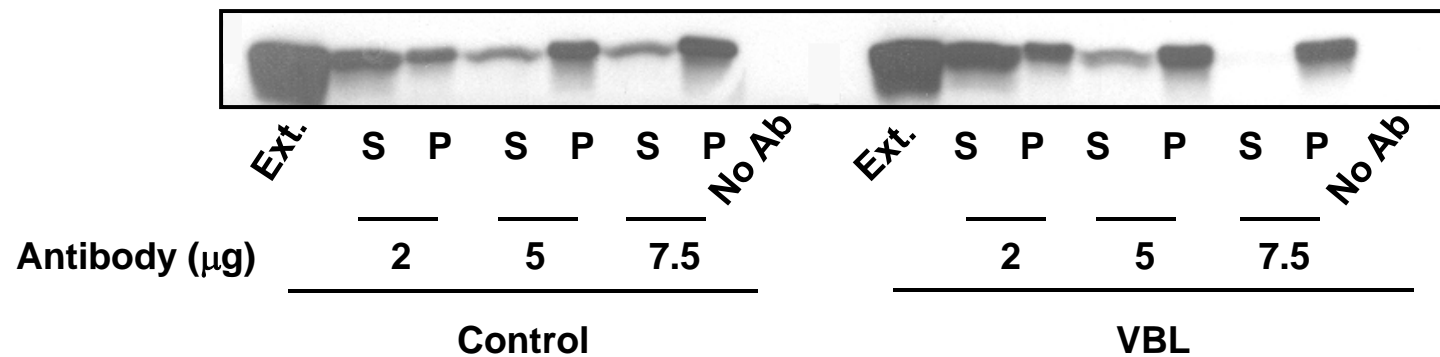

**Fig. S3: Quantitative immunoprecipitation of Bcl-xL.** Extracts (Ext.) were prepared from untreated or vinblastine (VBL, 200 nM) treated KB-3/HA-Bcl-xL cells and 1 mg aliquots were subjected to incubation with increasing concentrations of rabbit Bcl-xL antibody as indicated. Immunoprecipitates (P) and supernatants (S) were immunoblotted with mouse monoclonal Bcl-xL antibody. “No Ab” indicates immunoprecipitation conducted in the absence of antibody.

# Supplemental Figure S4

A

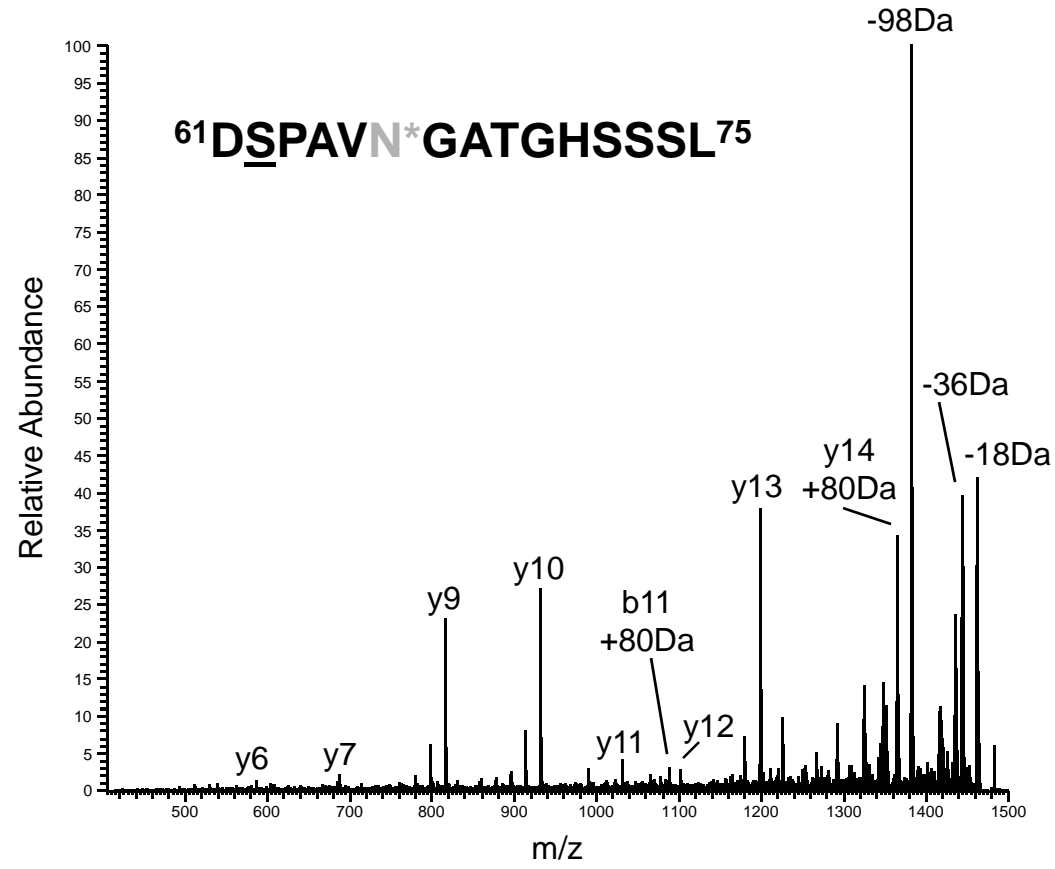

## Supplemental Figure S4

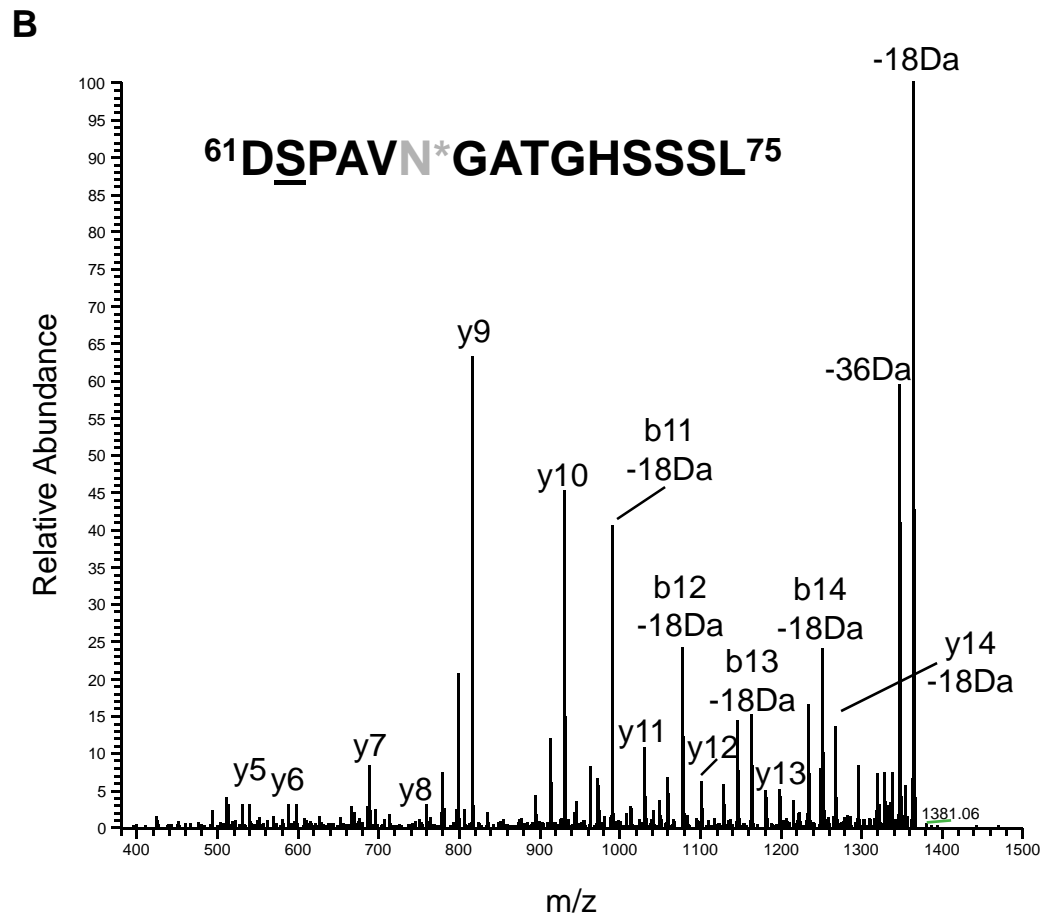

**Fig. S4:** Tandem mass spectrometric analysis mapping the single phosphorylation site Ser62 (underlined) in phosphopeptide 61-75. **A**, The signature phosphopeptide neutral loss of 98 Da from the parent ion is indicated. Fragment ions containing the phosphorylated amino acid will have a mass addition of 80 Da. Peptide deamidation was mapped to Asn66. **B**, MALDI-MS3 analysis of the -98Da fragment from vinblastine-treated HA-Bcl-xL phosphopeptide 61-75 provided further confirmation that Ser62 was phosphorylated and Asn66 was deamidated. Fragment ions that contained the phosphorylated amino acid will show an 18 Da mass loss.

## Supplemental Figure S5

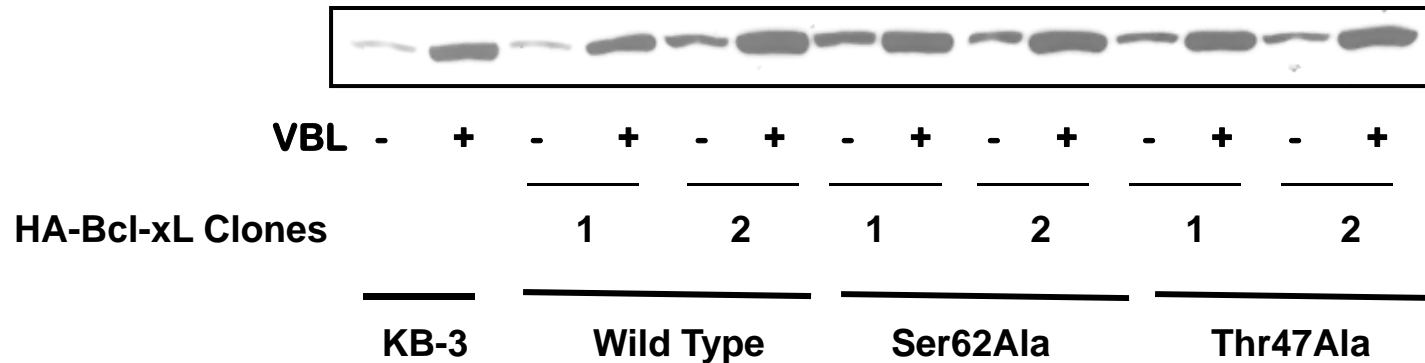

**Fig. S5: Ser62 to Ala mutation of Bcl-xL does not alter mitotic arrest caused by vinblastine treatment.** KB-3 cells or cell lines overexpressing wild-type Bcl-xL, Bcl-xL(S62A) or Bcl-xL(T47A) (2 clones of each) were untreated or treated with 30 nM vinblastine (VBL) for 16 h and cell extracts subjected to immunoblotting for cyclin B
